# Supplementary material for: Design of a multifunctional vanadium pentoxide/polymer biocomposite for implant-coating applications
Source: Royal Society of Chemistry journal article supplement (doi:10.1039/c7ra06471c), 2017-01-01
Supplement: c7ra06471c1.pdf [file c7ra06471c1.pdf]

## Supplementary information

### Supplementary experimental details

The  $V_2O_5$  MPs/PLA and  $V_2O_5$  MPs/chitosan coatings were prepared and subjected to SEM observation using the same procedures as for the  $V_2O_5$  NWs/PLA and  $V_2O_5$  NWs/chitosan coatings, respectively.

The  $V_2O_5$ /polymer coatings of interest were placed in liquid nitrogen. After 1 min, they were cracked and subjected to lyophilization. Prior to the SEM observation, they were stuck on the membrane and carbon coated. The SEM images were collected using a JEOL 7600F electron microscope.

### Supplementary results:

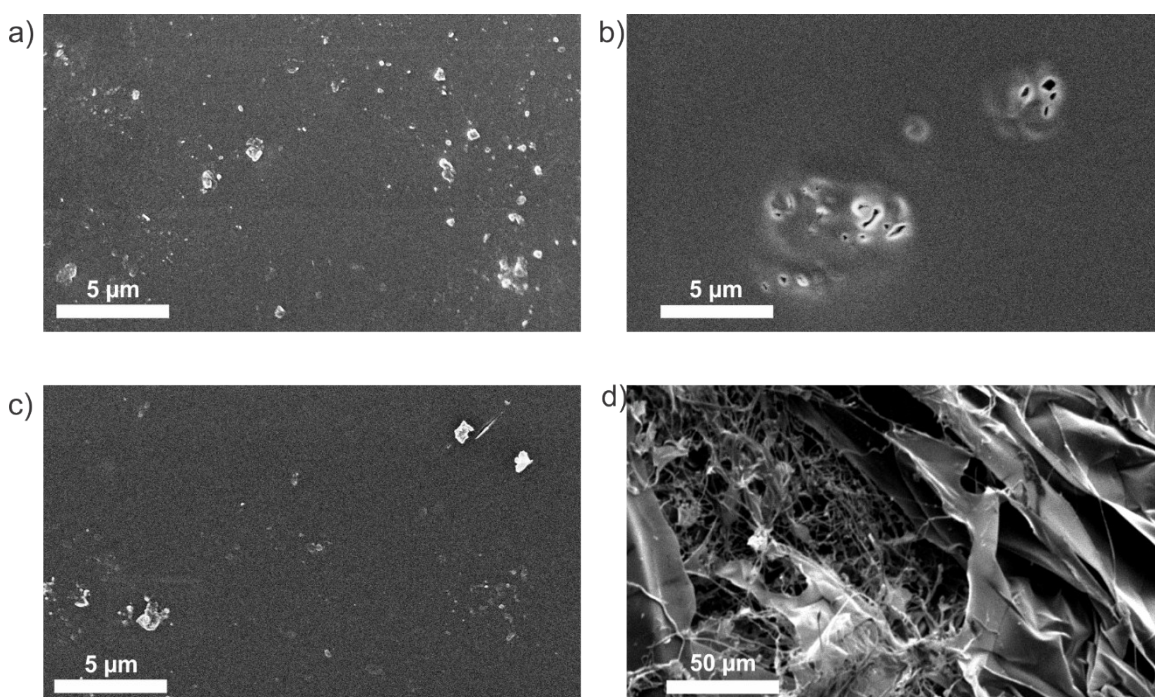

Figure S1: SEM micrographs of the surface of the  $V_2O_5$  MPs/PLA a) before and b) after exposure to PBS;  $V_2O_5$  MPs/Chitosan c) before and d) after exposure to PBS.

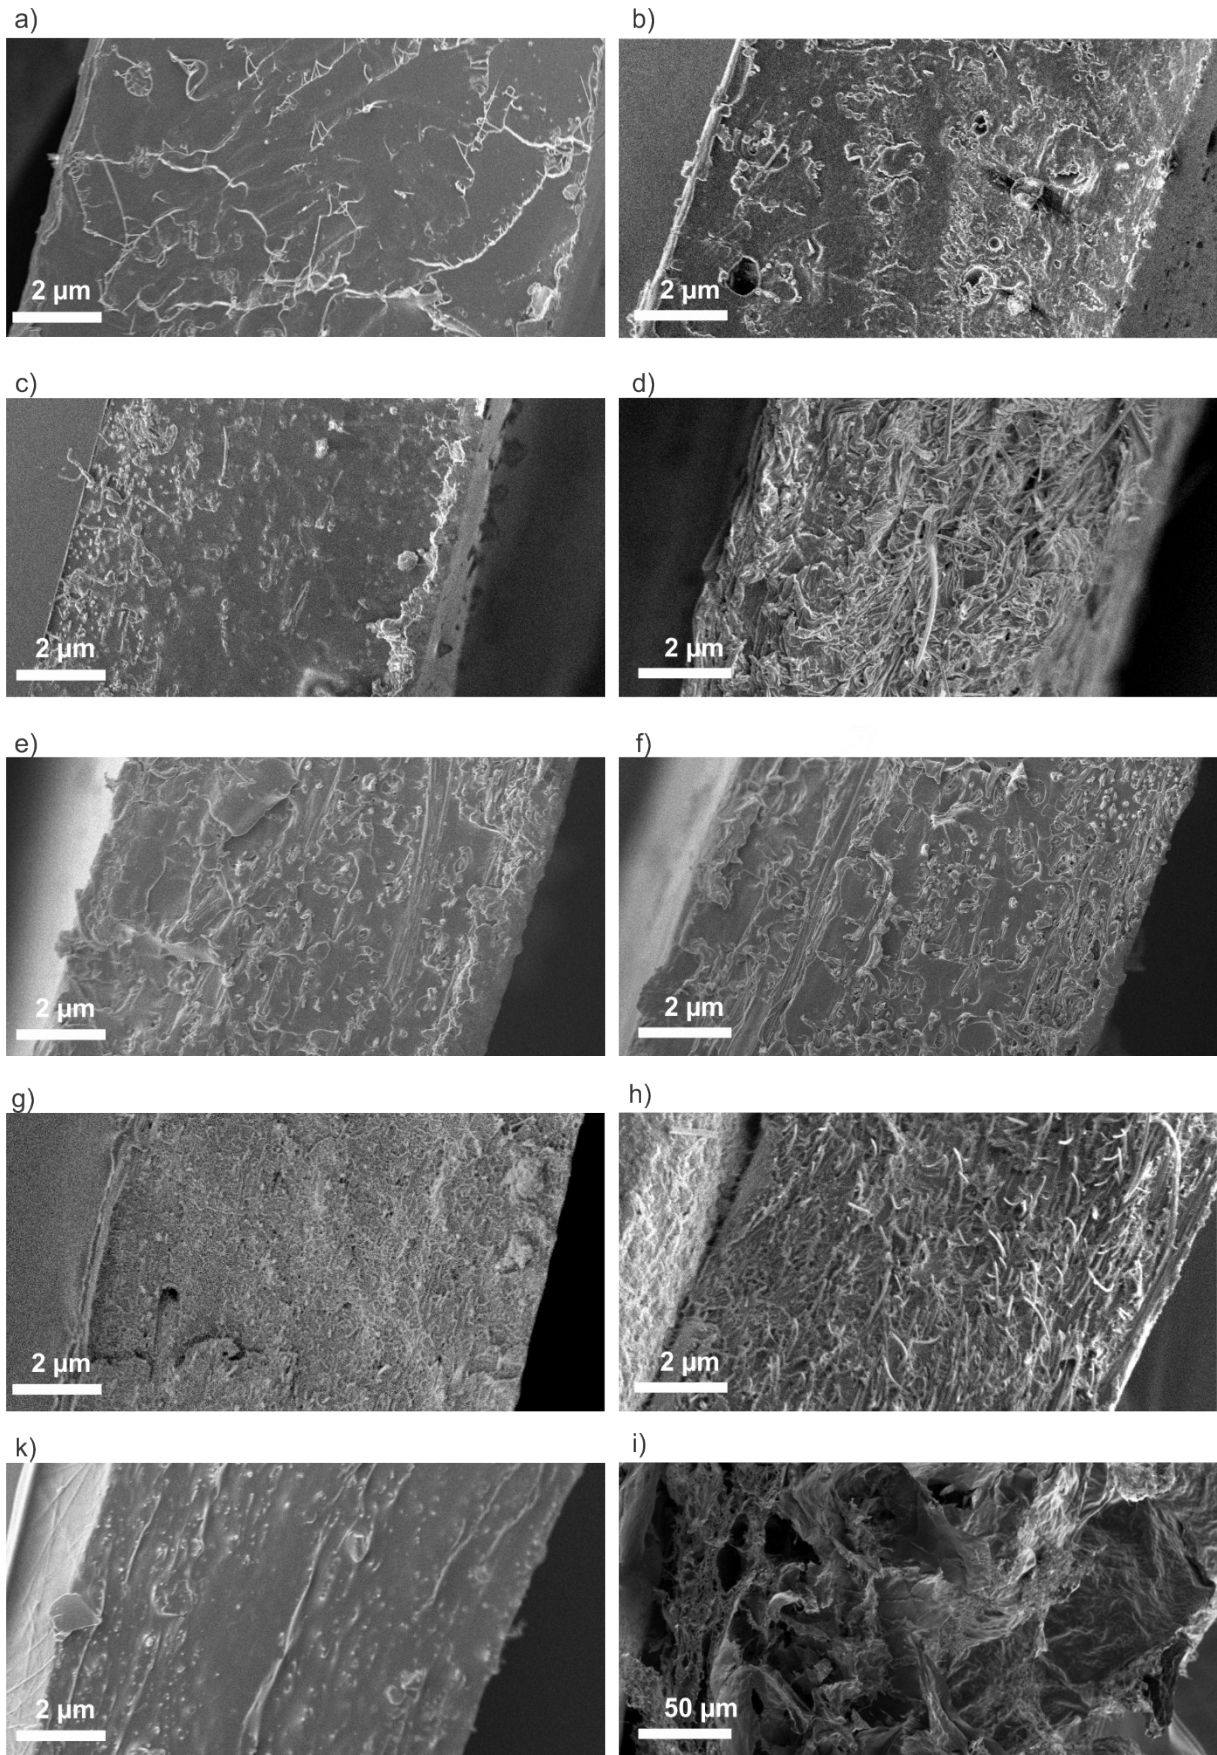

Figure S2: SEM micrographs of breakage of V<sub>2</sub>O<sub>5</sub> MPs/PLGA composite a) before and b) after exposure to PBS; breakage of V<sub>2</sub>O<sub>5</sub> NWs/PLGA c) before and d) after exposure to PBS; breakage of

$V_2O_5$  NWs/PLA e) before and f) after exposure to PBS; breakage of  $V_2O_5$  NWs/PS g) before and h) after exposure to PBS; breakage of  $V_2O_5$  NWs/Chitosan k) before and i) after exposure to PBS

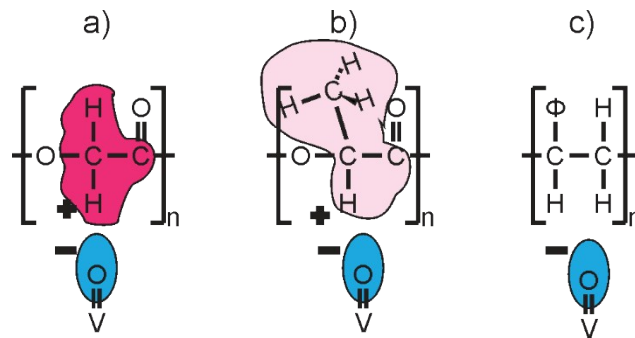

Figure S3: Molecular representation of polar interphase interactions between  $V_2O_5$  NWs and a) PLGA, b) PLA and c) PS.
